# Supplementary material
Source: Springer Nature journal article supplement (https://www.springermedizin.de/resource/supplementary/13587_2012_32_MOESM4_ESM.pdf/9677154)

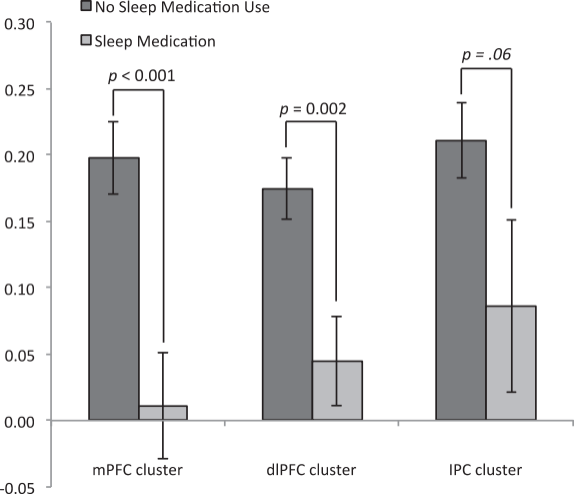

Supplement: MOESM4 [file 9677154]
